# Supplementary material for: Extracting the Jugular Venous Pulse from Anterior Neck Contact Photoplethysmography
Source: PubMed Central journal article supplement (PMC7044195; doi:10.1038/s41598-020-60317-7), 2020-02-26
Supplement: 41598_2020_60317_MOESM1_ESM.pdf [file 41598_2020_60317_MOESM1_ESM.pdf]

# Supplementary information: EXTRACTING THE JUGULAR VENOUS PULSE FROM ANTERIOR NECK CONTACT PHOTOPLETHYSMOGRAPHY

Irene García-López<sup>1,\*</sup> and Esther Rodriguez-Villegas<sup>1</sup>

<sup>1</sup>Department of Electrical and Electronic Engineering, Imperial College London, London, SW7 2AZ, United Kingdom

\*irene.garcia-lopez15@imperial.ac.uk

## Table of contents:

- **Figure 1:** Recordings extracts of 10s duration showing neck JVP and finger arterial PPG signals for all subjects (n=20).
- **Table 1:** Average time differences between characteristic peaks and waves from neck JVP, finger PPG, and ECG signals.

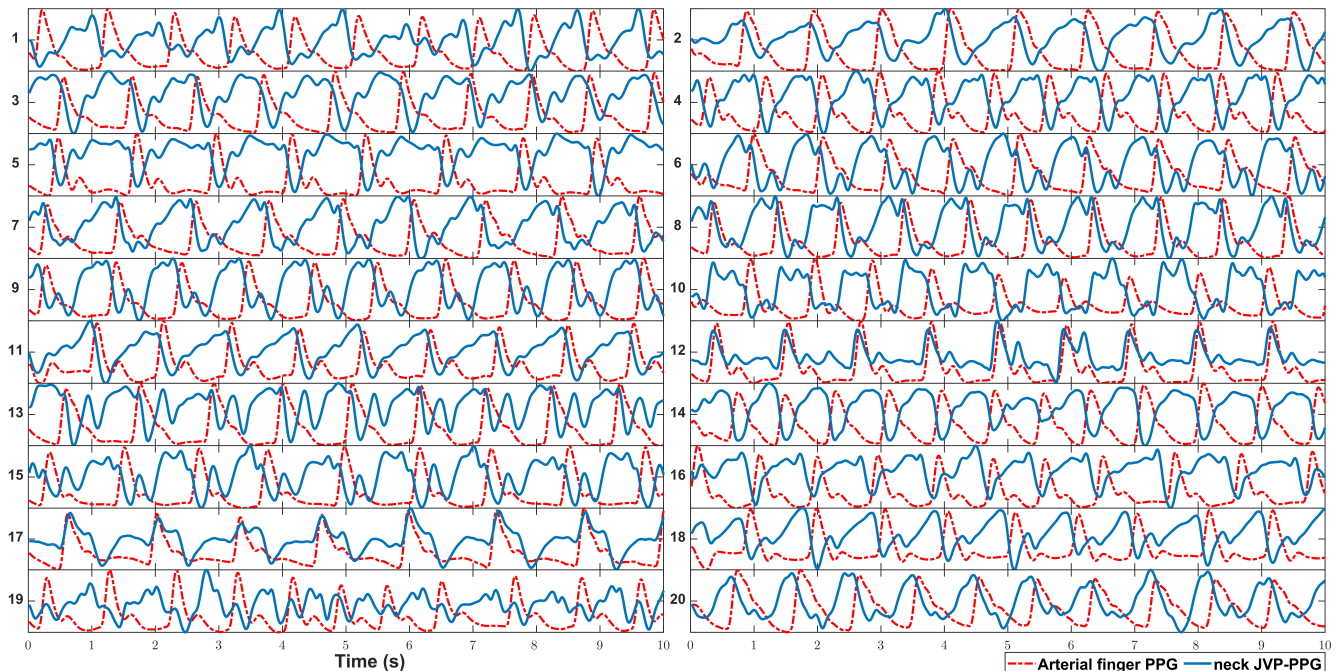

**Figure 1.** Recordings extracts of 10s duration showing neck JVP and finger arterial PPG signals for all subjects (n=20). Signals were normalized in amplitude in the range [0,1] for visualization purposes.

**Table 1. Average time differences between characteristic peaks and waves from neck JVP, finger PPG, and ECG signals.** Mean differences (in ms) normalized by the  $v-v$  interval (1s) are presented for each subject (n=20) together with the standard deviation ( $\mu \pm \sigma$ ). **S** represents the arterial finger PPG systolic peak, **R** is the QRS complex peak of the ECG and **a,c,v** correspond to the JVP waves. **O** indicates the onset of the JVP pulse.

| <i>Subj.</i> | <i>1</i>     | <i>2</i>     | <i>3</i>     | <i>4</i>     | <i>5</i>     | <i>6</i>     | <i>7</i>     | <i>8</i>     | <i>9</i>     |
|--------------|--------------|--------------|--------------|--------------|--------------|--------------|--------------|--------------|--------------|
| <b>S-R</b>   | 427.6 ± 18.9 | 380.1 ± 10.5 | 382.7 ± 54.7 | 457.3 ± 10.9 | 355.1 ± 10.8 | 370.2 ± 15.1 | 356.1 ± 21.4 | 387.3 ± 14.4 | 357.4 ± 8.6  |
| <b>S-c</b>   | 270.8 ± 18.2 | 205.6 ± 22   | 248.4 ± 39.6 | 349.3 ± 13   | 249.2 ± 16   | 243.6 ± 18.9 | 221.1 ± 26   | 285.2 ± 34.5 | 285.1 ± 15.6 |
| <b>c-R</b>   | 156.9 ± 5.5  | 174.5 ± 19.7 | 134.3 ± 17.4 | 108 ± 5.2    | 105.9 ± 5.7  | 126.6 ± 6.8  | 135 ± 11.6   | 102.1 ± 34   | 72.3 ± 13.4  |
| <b>c-v</b>   | 650.4 ± 49.5 | 440.8 ± 31   | 456.2 ± 66.8 | 435.1 ± 16.7 | 552.4 ± 25.7 | 508.7 ± 11.2 | 518.1 ± 30.5 | 446.3 ± 40.2 | 526.1 ± 30.3 |
| <b>c-a</b>   | 215.8 ± 13   | 222.8 ± 9    | 231 ± 38.1   | 121.5 ± 14.3 | 294.8 ± 36.2 | 150 ± 14.1   | 280 ± 34.2   | 124.2 ± 13.4 | 127 ± 15.4   |
| <b>a-v</b>   | 434.6 ± 52.7 | 218 ± 29.6   | 225.1 ± 42.5 | 313.6 ± 9.9  | 257.6 ± 19.1 | 358.8 ± 12.2 | 238.1 ± 10.4 | 322.1 ± 28.9 | 399.2 ± 16.6 |
| <b>R-v</b>   | 493.5 ± 48.5 | 266.3 ± 37.2 | 321.9 ± 81.5 | 327 ± 17.6   | 446.4 ± 21.1 | 382.1 ± 12.5 | 383.1 ± 36.4 | 344.2 ± 19.1 | 453.8 ± 29.8 |
| <b>R-O</b>   | 636.3 ± 22.1 | 439.3 ± 15.6 | 483.8 ± 66.3 | 510.3 ± 7.9  | 625 ± 18.2   | 531.8 ± 5.3  | 515.2 ± 25.6 | 462.7 ± 9.2  | 589 ± 15.2   |
| <b>R-a</b>   | 58.9 ± 13.6  | 48.3 ± 28.1  | 96.7 ± 48.1  | 13.5 ± 16.8  | 188.9 ± 31.8 | 23.3 ± 12.1  | 145 ± 39.4   | 22.1 ± 24.7  | 54.7 ± 16.1  |

  

| <i>Subj.</i> | <i>10</i>    | <i>11</i>    | <i>13</i>    | <i>14</i>    | <i>15</i>    | <i>16</i>    | <i>18</i>    | <i>19</i>    | <i>20</i>    |
|--------------|--------------|--------------|--------------|--------------|--------------|--------------|--------------|--------------|--------------|
| <b>S-R</b>   | 396 ± 32.6   | 362.6 ± 10.9 | 368.9 ± 7.9  | 417.5 ± 27.1 | 353.7 ± 14.9 | 374.7 ± 37.3 | 370.7 ± 43.4 | 409.5 ± 44.5 | 396.6 ± 17.3 |
| <b>S-c</b>   | 267.8 ± 8.9  | 252.6 ± 6.8  | 191.2 ± 9.9  | 280.7 ± 18.3 | 240.2 ± 19.1 | 263.3 ± 28.1 | 197.6 ± 9.1  | 331.3 ± 42   | 259.3 ± 21.1 |
| <b>c-R</b>   | 128.2 ± 27.7 | 110 ± 7.8    | 177.7 ± 15.4 | 136.8 ± 18.1 | 113.5 ± 4.7  | 111.4 ± 12.2 | 173.2 ± 42.5 | 78.2 ± 14    | 137.4 ± 24.3 |
| <b>c-V</b>   | 504.9 ± 34.3 | 447.4 ± 13.5 | 500.3 ± 23.6 | 478.7 ± 15   | 555.2 ± 38.8 | 619.3 ± 42.9 | 590.8 ± 43.2 | 380.9 ± 58.4 | 454.3 ± 30.6 |
| <b>c-a</b>   | 251.2 ± 23.3 | 210 ± 12.2   | 207 ± 42     | 222.2 ± 27.1 | 192.1 ± 37.3 | 210.2 ± 36.6 | 231.4 ± 44.1 | 149.6 ± 19.8 | -            |
| <b>a-v</b>   | 253.7 ± 55.3 | 237.4 ± 11   | 293.3 ± 28.3 | 256.5 ± 16.2 | 363 ± 5      | 409.1 ± 74.8 | 359.4 ± 49.1 | 231.3 ± 63   | -            |
| <b>R-v</b>   | 376.7 ± 24.2 | 337.4 ± 14.9 | 322.6 ± 11.4 | 341.9 ± 21   | 441.7 ± 41.5 | 507.9 ± 51   | 417.6 ± 51.4 | 302.7 ± 59.9 | 316.9 ± 23.5 |
| <b>R-O</b>   | 562.7 ± 31.3 | 507.4 ± 10.5 | 516.3 ± 6.4  | 570.4 ± 28.7 | 578.4 ± 21   | 699 ± 40.7   | 634 ± 40.8   | 456.3 ± 67.7 | 418 ± 5.9    |
| <b>R-a</b>   | 123 ± 46.3   | 100 ± 13     | 29.3 ± 36.2  | 85.4 ± 30.9  | 78.6 ± 39.9  | 98.8 ± 26    | 58.2 ± 8.3   | 71.4 ± 8.6   | -            |
